# Supplementary material for: Role of targeted therapies in rheumatic patients on COVID-19 outcomes: results from the COVIDSER study
Source: HighWire-hosted journal article supplement (doi:10.1136/rmdopen-2021-001925), 2021-12-01
Supplement: rmdopen-2021-001925supp001_data_supplement.pdf [file rmdopen-2021-001925supp001_data_supplement.pdf]

**Supplementary Table 1.** Agreement between model-predicted and observed values according to COVID diagnosis.

|                    |                  | <b>Observed</b>                              |                          |                                              |                          |
|--------------------|------------------|----------------------------------------------|--------------------------|----------------------------------------------|--------------------------|
|                    |                  | COVID-19 Confirmed (Positive test) (N = 294) |                          | COVID-19 Suspected (test not done) (N = 132) |                          |
|                    |                  | Non-Hospitalized<br>(N = 207)                | Hospitalized<br>(N = 87) | Non-Hospitalized<br>(N = 113)                | Hospitalized<br>(N = 19) |
| <b>Predicted</b>   | Non-Hospitalized | 197 (95.2)                                   | 27 (31.0)                | 99 (87,6)                                    | 6 (31,6)                 |
|                    | Hospitalized     | 10 (4.8)                                     | 60 (69.0)                | 10 (12,4)                                    | 12 (68,4)                |
| <b>Kappa Coef.</b> |                  | 0.680                                        |                          | 0.477                                        |                          |
