# Supplementary material for: Role of targeted therapies in rheumatic patients on COVID-19 outcomes: results from the COVIDSER study
Source: HighWire-hosted journal article supplement (doi:10.1136/rmdopen-2021-001925), 2021-12-01
Supplement: rmdopen-2021-001925supp002_data_supplement.pdf [file rmdopen-2021-001925supp002_data_supplement.pdf]

**Supplementary Table 2.** Contingency table of treatment with csDMARD, ts/bDMARD and combination in Hospitalized and Non-hospitalized patients

|                         | Treatment    |                |                       | Total      |
|-------------------------|--------------|----------------|-----------------------|------------|
|                         | Only csDMARD | Only ts/bDMARD | csDMARD<br>+ts/bDMARD |            |
| Hospitalized, n (%)     | 35 (29.9)    | 39 (22.3)      | 32(24.6)              | 106 (24.9) |
| Non-Hospitalized, n (%) | 86 (71.1)    | 136 (77.7)     | 98 (75.4)             | 320 (75.1) |
| Total, n<br>p=0.429     | 121          | 175            | 130                   | 426        |

bDMARD, biologic disease-modifying anti-rheumatic drugs; csDMARD, conventional synthetic disease-modifying anti-rheumatic drugs; tsDMARD, targeted synthetic disease-modifying anti-rheumatic drugs
